# Supplementary material for: Sex-specific stress and biobehavioral responses to human experimenters in rats
Source: Frontiers journal article supplement (doi:10.3389/fnins.2022.965500), 2022-07-22
Supplement: Data_Sheet_1.PDF [file Data_Sheet_1.PDF]

(Supplemental Information)

# Sex-specific Stress and Biobehavioural Responses to Human Experimenters in Rats

Faraji *et al.*

## Supplemental Figures

**Figure 1.** *Correlational analysis.* Most trials in Experiment 1 to 4 revealed no significant correlation between surface temperature and thigmotaxis before and after stress (panels A&B). Stress-induced thermal changes in general did not predict post-stress thermal responses to the experimenter sex in both groups (panel C). Yellow, green and purple triangles in the corners represent *B. Baseline*, *C. Baseline*, and *D. IR recording (stress-open field)*, respectively. \* $p \leq 0.05$ , \*\* $p \leq 0.01$ ; Pearson's correlation,  $n = 5-6/\text{group}$ .

**Figure 2.** *Correlational analysis.* (A) Plasma CORT and thigmotaxis were positively correlated in both sexes, particularly in female rats. (B) There was no significant correlation between the cutaneous temperature and CORT. (C) A significant negative correlation was found between the plasma CORT and OT in female rats in Experiments 1 and 2, whereas the correlation between the CORT and OT in male rats was not significant. Purple and pink triangles in the corners

represent *D. Stress* and *E. Blood Collection*, respectively.  $**p \leq 0.01$ ; Spearman correlation,  $n = 4-6/\text{group}$ .
